# Supplementary material for: Novel Metabolic Subtypes in Pregnant Women and Risk of Early Childhood Obesity in Offspring
Source: PubMed Central journal article supplement (PMC10074224; doi:10.1001/jamanetworkopen.2023.7030), 2023-04-04

## Supplemental Online Content

Francis EC, Kechris K, Jansson T, Dabelea D, Perng W. Novel metabolic subtypes in pregnant women and risk of early childhood obesity in offspring. *JAMA Netw Open*. 2023;6(4):e237030. doi:10.1001/jamanetworkopen.2023.7030

**eTable 1.** Characteristics of 1,325 Pregnant Women in the Healthy Start Study by Availability of Offspring Anthropometry Data at the Early Childhood Visit

**eTable 2.** Mean  $\pm$  SD of Metabolic Markers Among 1,325 Pregnant Women in the Healthy Start Study, Overall and According to Metabolic Subgroup Membership

**eFigure.** Flow Diagram of the Analytical Sample of Pregnant Women and Their Offspring in the Healthy Start Study

This supplemental material has been provided by the authors to give readers additional information about their work.

**eTable 1. Characteristics of 1,325 Pregnant Women in the Healthy Start Study by Availability of Offspring Anthropometry Data at the Early Childhood Visit**

| <b>Maternal Characteristics:</b>                       | <b>Early childhood anthropometric data</b> |                   | <b>P-value</b> |
|--------------------------------------------------------|--------------------------------------------|-------------------|----------------|
|                                                        | <b>Yes (N=727)</b>                         | <b>No (N=598)</b> |                |
| Maternal subgroup                                      |                                            |                   | 0.94           |
| Insulin sensitive (Reference)                          | 33.4 (243)                                 | 32.6 (195)        |                |
| High HDL-C                                             | 13.3 (97)                                  | 14.2 (85)         |                |
| Dyslipidemic-High TG                                   | 27.1 (197)                                 | 26.4 (158)        |                |
| Dyslipidemic-High FFA                                  | 8.3 (60)                                   | 9.4 (56)          |                |
| IR-Hyperglycemic                                       | 17.9 (130)                                 | 17.4 (104)        |                |
| Age, years; mean $\pm$ SD                              | 28.3 $\pm$ 6.1                             | 27.1 $\pm$ 6.2    | <0.001         |
| Race/ethnicity (% , n)                                 |                                            |                   | 0.22           |
| Hispanic                                               | 23.8 (173)                                 | 24.9 (149)        |                |
| Non-Hispanic Black                                     | 15.1 (110)                                 | 16.2 (97)         |                |
| Non-Hispanic White                                     | 55.6 (406)                                 | 51.3 (307)        |                |
| Non-Hispanic other                                     | 5.2 (38)                                   | 7.5 (45)          |                |
| Education (% , n)                                      |                                            |                   | 0.01           |
| High school or less                                    | 28.8 (209)                                 | 36.6 (219)        |                |
| Some college/assoc. degree                             | 24.2 (176)                                 | 23.9 (143)        |                |
| College graduate                                       | 21.9 (159)                                 | 22.2 (133)        |                |
| Graduate degree                                        | 25.1 (183)                                 | 17.2 (103)        |                |
| Nulliparous (% , n)                                    | 48.8 (355)                                 | 45.3 (281)        | 0.50           |
| Smoked during pregnancy (% , n)                        | 6.5 (47)                                   | 12.4 (74)         | <0.001         |
| Healthy Eating Index; mean $\pm$ SD                    | 54.8 $\pm$ 13.4                            | 53.1 $\pm$ 13.9   | 0.03           |
| Prepregnancy BMI $\geq$ 30.0 kg/m <sup>2</sup> (% , n) | 20.1 (146)                                 | 19.0 (113)        | 0.10           |
| Gestational Diabetes Mellitus (% , n)                  | 4.8 (33)                                   | 3.7 (19)          | 0.35           |

Non-Hispanic other: due to low cell sizes for some of the categories, we combined American Indian or Alaska Native, Asian, Native Hawaiian or Pacific Islander and >1 race into a single category of “non-Hispanic other.” P-value from Chi-square tests for categorical variables and Type3 tests for significant main effects for continuous variables.

**eTable 2. Mean ± SD of Metabolic Markers Among 1,325 Pregnant Women in the Healthy Start Study, Overall and According to Metabolic Subgroup Membership**

| <b>Maternal metabolic marker:</b>  | <b>Full Sample</b> | <b>Reference</b> | <b>High HDL-C</b> | <b>Dyslipidemic-High TG</b> | <b>Dyslipidemic-High FFA</b> | <b>Insulin Resistant-Hyperglycemic</b> | <b>P</b> |
|------------------------------------|--------------------|------------------|-------------------|-----------------------------|------------------------------|----------------------------------------|----------|
| <b>Median 17 gestational weeks</b> |                    |                  |                   |                             |                              |                                        |          |
| Glucose, mg/dL                     | 76.7 ± 6.9         | 76.2 ± 6.3       | 75.0 ± 5.8        | 77.8 ± 6.3                  | 75.0 ± 6.2                   | 85.6 ± 7.9                             | <0.001   |
| Insulin, uIU/mL                    | 13.2 ± 8.3         | 10.3 ± 4.0       | 10.2 ± 4.1        | 15.4 ± 5.7                  | 11.7 ± 5.0                   | 32.7 ± 11.0                            | <0.001   |
| HOMA-IR                            | 2.5 ± 1.8          | 1.9 ± 0.8        | 1.9 ± 0.8         | 3.0 ± 1.2                   | 2.2 ± 0.9                    | 6.9 ± 2.3                              | <0.001   |
| TGs:HDL-C                          | 2.1 ± 1.1          | 1.7 ± 0.6        | 1.6 ± 0.5         | 4.0 ± 1.3                   | 2.1 ± 0.7                    | 2.7 ± 1.1                              | <0.001   |
| TGs, mg/dL                         | 122.7 ± 49.6       | 94.1 ± 26.6      | 115.2 ± 32.0      | 202.6 ± 54.4                | 115.9 ± 30.9                 | 142.6 ± 44.9                           | <0.001   |
| Total-C, mg/dL                     | 182.1 ± 35.8       | 159.0 ± 22.1     | 214.7 ± 26.9      | 196.2 ± 36.2                | 170.3 ± 27.2                 | 171.8 ± 32.7                           | <0.001   |
| HDL-C, mg/dL                       | 61.1 ± 12.9        | 58.1 ± 9.2       | 74.6 ± 10.2       | 52.6 ± 9.4                  | 55.9 ± 9.9                   | 55.2 ± 11.0                            | <0.001   |
| FFAs, uEq/L                        | 375.8 ± 167.9      | 266.1 ± 94.4     | 341.6 ± 119.3     | 405.1 ± 138.3               | 590.1 ± 134.4                | 416.9 ± 185.0                          | <0.001   |
| TNF-α                              | 1.3 ± 1.3          | 1.3 ± 1.3        | 1.2 ± 1.1         | 1.4 ± 1.8                   | 1.4 ± 1.5                    | 1.3 ± 1.1                              | 0.59     |
| <b>Median 27 gestational weeks</b> |                    |                  |                   |                             |                              |                                        |          |
| Glucose, mg/dL                     | 78.0 ± 8.5         | 76.7 ± 7.4       | 76.5 ± 7.1        | 81.2 ± 9.0                  | 76.9 ± 6.6                   | 85.4 ± 12.9                            | <0.001   |
| Insulin, uIU/mL                    | 17.9 ± 16.8        | 15.2 ± 19.0      | 14.1 ± 11.5       | 22.9 ± 18.5                 | 17.5 ± 9.7                   | 33.7 ± 20.1                            | <0.001   |
| HOMA-IR                            | 3.6 ± 4.4          | 3.0 ± 5.0        | 2.8 ± 2.8         | 4.8 ± 5.0                   | 3.4 ± 2.1                    | 7.4 ± 5.9                              | <0.001   |
| HbA1C, %                           | 2.8 ± 1.4          | 2.3 ± 1.0        | 2.2 ± 0.9         | 4.6 ± 1.8                   | 2.8 ± 1.1                    | 3.3 ± 1.5                              | <0.001   |
| TGs:HDL-C                          | 5.0 ± 0.3          | 4.9 ± 0.3        | 5.0 ± 0.3         | 5.0 ± 0.3                   | 5.0 ± 0.3                    | 5.2 ± 0.4                              | <0.001   |
| TGs, mg/dL                         | 163.2 ± 62.0       | 137.5 ± 42.7     | 154.7 ± 50.5      | 241.4 ± 70.5                | 157.2 ± 49.7                 | 177.0 ± 63.9                           | <0.001   |
| Total-C, mg/dL                     | 211.3 ± 40.9       | 195.0 ± 31.0     | 241.0 ± 36.4      | 219.3 ± 41.8                | 198.3 ± 34.8                 | 189.8 ± 39.6                           | <0.001   |
| HDL-C, mg/dL                       | 63.4 ± 13.4        | 61.9 ± 10.9      | 73.9 ± 12.0       | 54.6 ± 10.7                 | 59.8 ± 12.2                  | 56.8 ± 11.8                            | <0.001   |
| FFAs, uEq/L                        | 372.4 ± 147.1      | 331.1 ± 136.3    | 381.0 ± 145.5     | 405.5 ± 148.3               | 405.1 ± 156.8                | 385.6 ± 135.9                          | <0.001   |
| TNF-α, pg/mL                       | 1.4 ± 1.5          | 1.5 ± 1.5        | 1.4 ± 1.2         | 1.4 ± 2.1                   | 1.4 ± 1.2                    | 1.3 ± 1.1                              | 0.86     |

Abbreviations: FFAs, free fatty acids; HbA1C, hemoglobin A1C; HDL-C, high density lipoprotein cholesterol; HOMA-IR, homeostatic model of assessment-insulin resistance; Total-C, total cholesterol; TGs, triglycerides; TNFα, tumor necrosis factor-α

Pvalue represents a test for significant main effects of the maternal metabolic subgroup (Type3)

**eFigure 1. Flow Diagram of the Analytical Sample of Pregnant Women and Their Offspring in the Healthy Start Study**

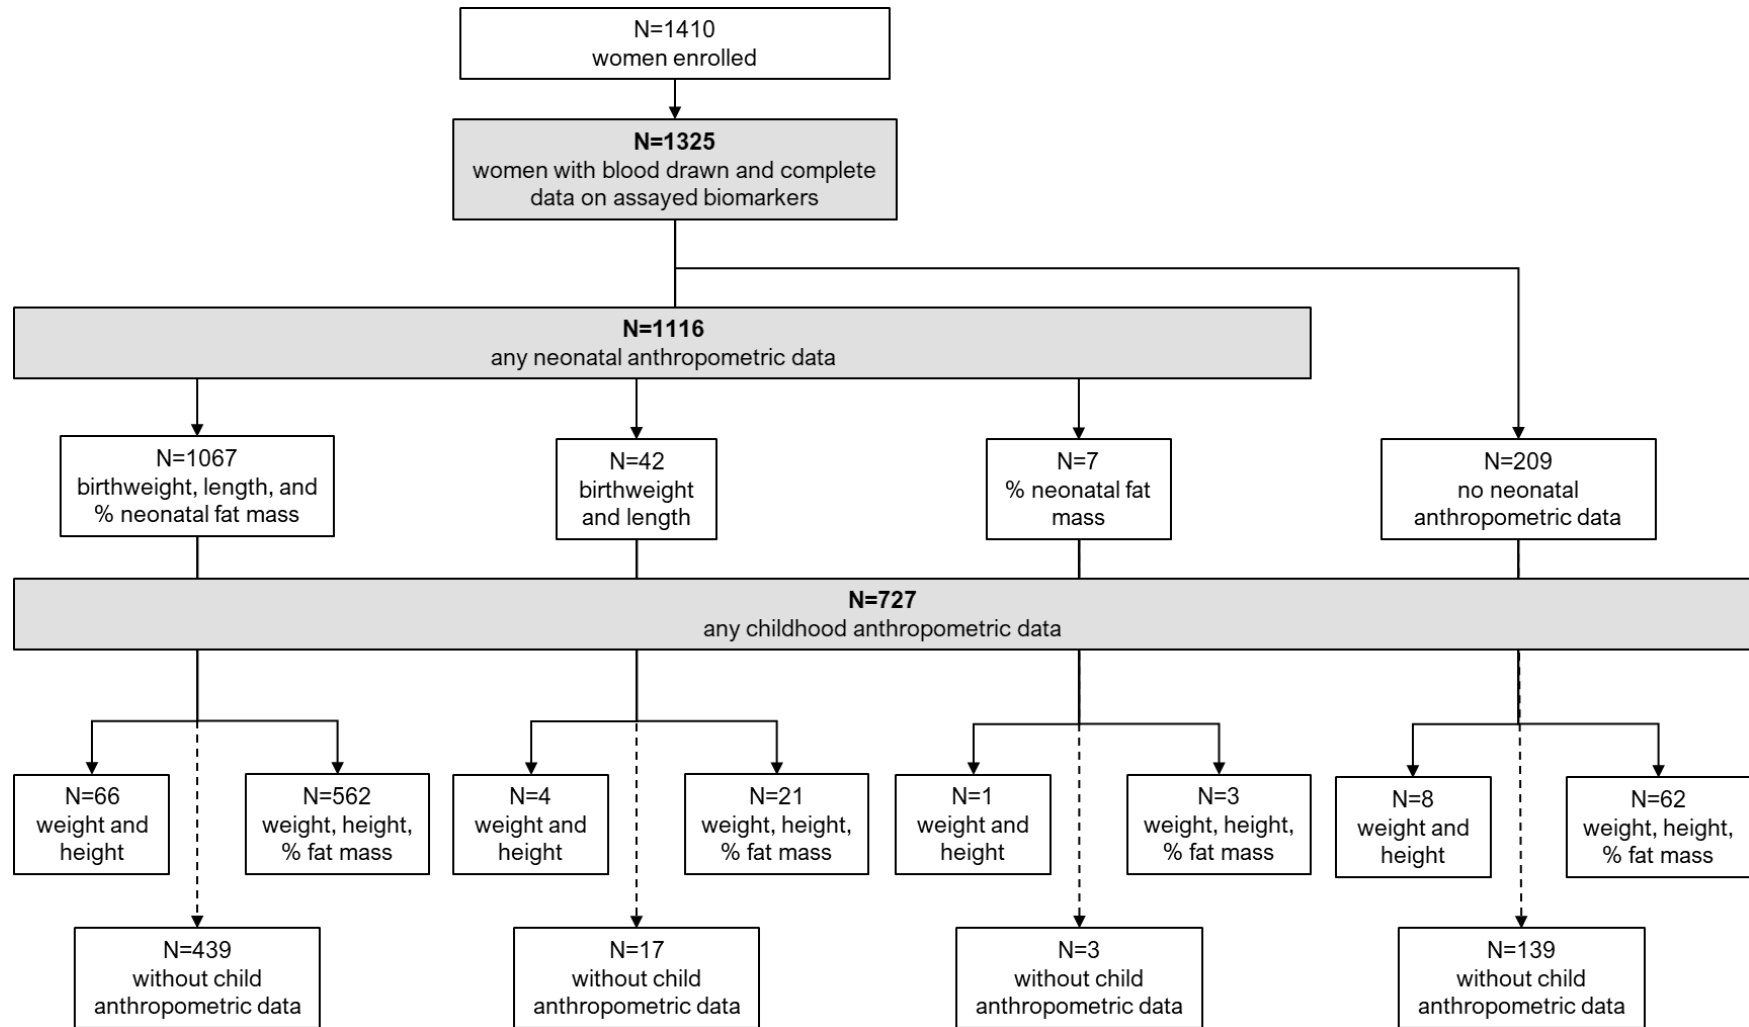

Supplement: jamanetwopen-e237030-s001.pdf [file jamanetwopen-e237030-s001.pdf]
