# Supplementary material for: Novel Metabolic Subtypes in Pregnant Women and Risk of Early Childhood Obesity in Offspring
Source: PubMed Central journal article supplement (PMC10074224; doi:10.1001/jamanetworkopen.2023.7030), 2023-04-04
Supplement: jamanetwopen-e237030-s002.pdf [file jamanetwopen-e237030-s002.pdf]

## Data Sharing Statement

Francis. Novel Metabolic Subtypes in Pregnant Women and Risk of Early Childhood Obesity in Offspring. *JAMA Netw Open*. Published April 04, 2023.

doi:10.1001/jamanetworkopen.2023.7030

### Data

**Data available:** Yes

**Data types:** Deidentified participant data

**How to access data:** [anna.bellatorre@cuanschutz.edu](mailto:anna.bellatorre@cuanschutz.edu)

**When available:** With publication

### Supporting Documents

**Document types:** None

### Additional Information

**Who can access the data:** Scientific researchers

**Types of analyses:** For scientific research

**Mechanisms of data availability:** Upon reasonable request
